# Supplementary material
Source: PubMed Central journal article supplement (PMC1533919)
Supplement: plntphys_pp.106.077693_3.pdf [file plntphys_pp.106.077693_3.pdf]

## SUPPLEMENTAL TABLES

### Sequences of the Primers Used in Quantitative PCR

| Gene           | Sequence (5' → 3')                                                    |
|----------------|-----------------------------------------------------------------------|
| <i>Taglu1a</i> | CGGCGGCTTCTTAAATAGGA (sense)<br>ACATCAAAGGCCATCCCTATC (antisense)     |
| <i>Taglu1b</i> | AGGTGTGCTTTAAGAACTTCGGT (sense)<br>GAACCATCCCATGTTGTAGTCA (antisense) |
| <i>Taglu1c</i> | CGGAAAGCCAAACCAGAA (sense)<br>CTAGGAGGATGTGGTGACCG (antisense)        |

### Sequences of the Primers for Heterologous Expression of *Taglu1s* and *Scglu* in *E. coli*

| Primer           | Sequence (5' → 3')                                                                                                                                                       |
|------------------|--------------------------------------------------------------------------------------------------------------------------------------------------------------------------|
| Sense primer     | AATCCATGGCAGGCACACCGTCAAAG                                                                                                                                               |
| Antisense primer | TGATATCTCGAGCCATGCATCCAGCCTTGG ( <i>Taglu1a</i> and <i>Taglu1b</i> )<br>AGCTCGAGACATAGCAGAGCACCACCTCT ( <i>Taglu1c</i> )<br>TATCTCGAGCCAGGATCCAGCATTGGA ( <i>Scglu</i> ) |

### Sequences of the Primers Used in Mutagenic PCR

| Mutant                   | Sequence (5' → 3')                                                              |
|--------------------------|---------------------------------------------------------------------------------|
| TaGlu1a- and ScGlu-E191A | AACGCGCCGCATACATATTGTTGT (sense)<br>TGTATGTGGCGCGTTAAAGGTGAA (antisense)        |
| TaGlu1a-F198A            | TGTTGTGCCTCCTATGGTGAGGGGAT (sense)<br>CCATAGGAGGCACAACAATATGTATGTGG (antisense) |
| ScGlu-F198A              | TGTTGTGCCTCATATGGAGAGGGGAT (sense)<br>CCATATGAGGCACAACAATATGTATGCG (antisense)  |
| TaGlu1a- and ScGlu-Y378A | ATTACCGGGACTGCATGGATTTAC (sense)<br>GTACATGTAAATCCATGCAGTCCC (antisense)        |
| TaGlu1a- and ScGlu-Y378F | GGGACTTTTTGGATTTACATGTAC (sense)<br>GTAAATCCAAAAAGTCCCGGTAAT (antisense)        |
| TaGlu1a-S464F            | GACAACTTTGAATGGTTCCTGGGC (sense)<br>GCTGTAGCCCAGGAACCATTCAA (antisense)         |
| ScGlu-G464F              | TTCGAGTGGTTCAGCGGCTA (sense)<br>CCGCTGAACCACTCGAAGTT (antisense)                |
| TaGlu1a- and ScGlu-E407A | ATCACTGCGAACGGAATTGCTGA (sense)<br>TTCCGTTTCGAGTGATGAAGATG (antisense)          |
| TaGlu1a- and ScGlu-F471Y | GAGGCCGTATCGTGAGCTGTA (sense)<br>CTCACGATACGGCCTCGTCTA (antisense)              |
| ScGlu-G464S              | TGGAGCAGCGGCTACAGCTC (sense)<br>TAGCCGCTGCTCCACTCGAA (antisense)                |

---

|                   |                                                                  |
|-------------------|------------------------------------------------------------------|
| ScGlu-S465L;      | TGGGGCCTCGGCTACAGCTC (sense)<br>TAGCCGAGGCCCACTCGAA (antisense)  |
| ScGlu-G464S/S465L | TGGAGCCTCGGCTACAGCTC (sense)<br>TAGCCGAGGCTCCACTCGAA (antisense) |

---

**The Sequences of the Primers for the Expression of Zm-TaGlu1a and -TaGlu1b**

---

| Primers          | Sequence (5' → 3')                                                                        |
|------------------|-------------------------------------------------------------------------------------------|
| Sense primer     | AGACCATGGCAAGAGTAGGCAGCCAAAATGGAGTCCAAATGTTGAG<br>CCCCTCGGAAATCCCACAAAGGGACTGGTTCGACAAGGA |
| Antisense primer | TGATATCTCGAGCCATGCATCCAGCCTTGG                                                            |

---
